# Supplementary material for: Estimation of the impact of Fasciola hepatica infection on time taken for UK beef cattle to reach slaughter weight
Source: PubMed Central journal article supplement (PMC5544673; doi:10.1038/s41598-017-07396-1), 2017-08-04
Supplement: 41598_2017_7396_MOESM1_ESM.pdf [file 41598_2017_7396_MOESM1_ESM.pdf]

Additional information for paper titled “Estimation of the impact of *Fasciola hepatica* infection on time taken for UK beef cattle to reach slaughter weight.” Authors: Stella Mazeri, Gustav Rydevik, Ian Handel, Barend M. deC. Bronsvort and Neil Sargison

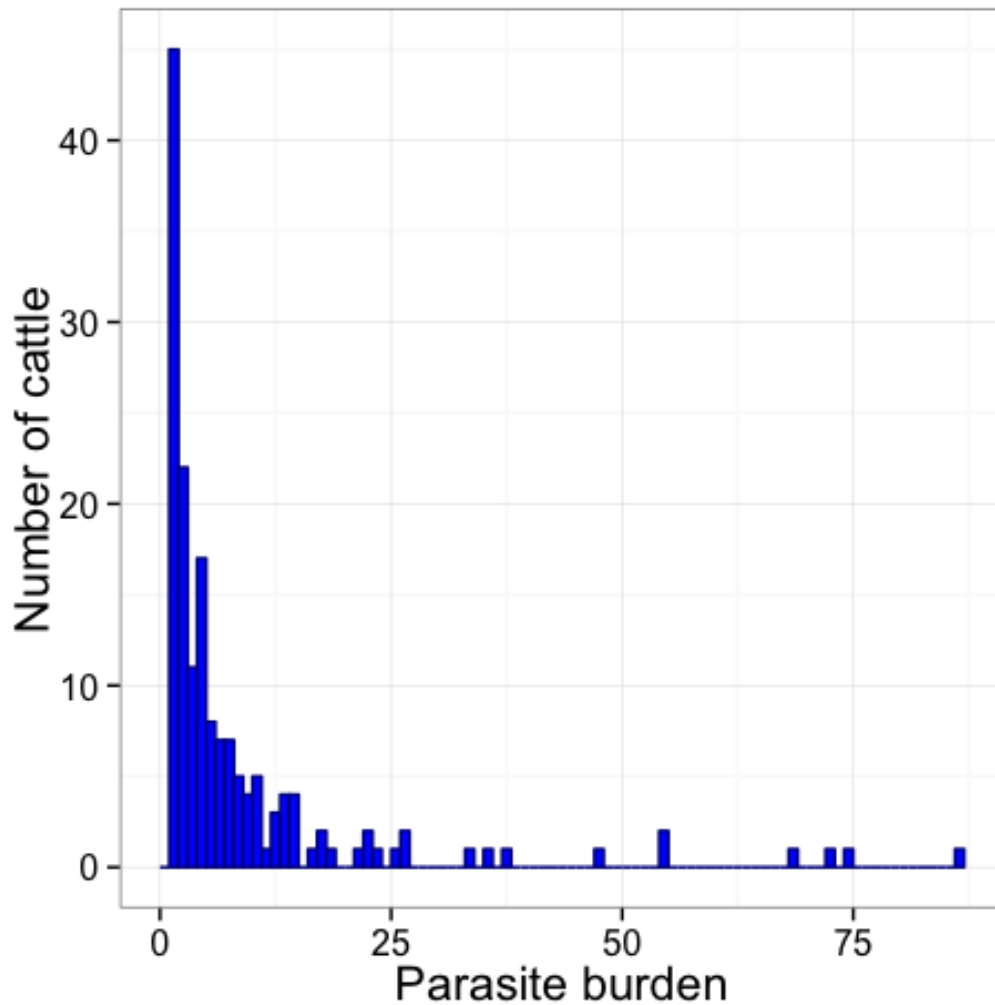

**Figure S1.** Distribution of parasite burden among tested cattle. Figure included animals with a parasite burden greater than 0 (n=164). The distribution is positively skewed with very few animals with burdens of more than 25 parasites.

| Variable | Levels               | 0   | 1  | 2  | 3  | Total |
|----------|----------------------|-----|----|----|----|-------|
| BREED    | Aberdeen Angus       | 25  | 11 | 6  | 2  | 44    |
|          | Aberdeen Angus Cross | 120 | 35 | 8  | 11 | 174   |
|          | British Blue Cross   | 13  | 1  | 3  | 1  | 18    |
|          | Charolais            | 4   | 7  | 1  | 0  | 12    |
|          | Charolais Cross      | 41  | 19 | 9  | 3  | 72    |
|          | Holstein Friesian    | 28  | 3  | 1  | 1  | 33    |
|          | Limousin             | 10  | 11 | 4  | 1  | 26    |
|          | Limousin Cross       | 68  | 32 | 12 | 6  | 118   |
|          | Other                | 46  | 22 | 14 | 3  | 85    |
|          | Simmental Cross      | 26  | 6  | 3  | 2  | 37    |
| SEX      | Female               | 125 | 56 | 23 | 11 | 215   |
|          | Male                 | 241 | 82 | 32 | 19 | 374   |

**Table S1.** Distribution of levels of observed fibrosis scores, depending on breed and depending on the sex of the animal.

**Table S2.** MHS model results. Point estimates and confidence intervals for model parameters for estimating average difference of the age at slaughter between animals with and without fluke at the mean slaughter carcass weight of 345 kg.

| Variable                           | Estimate | Lower 95% CI | Upper 95% CI |
|------------------------------------|----------|--------------|--------------|
| Intercept                          | 741.20   | 736.10       | 746.30       |
| fluke negative                     | 1        |              |              |
| fluke positive                     | 9.89     | 9.14         | 11.85        |
| weight.center                      | 0.72     | 0.69         | 0.77         |
| sex_female                         | 1        |              |              |
| sex_male                           | -38.91   | -40.47       | -37.90       |
| breed                              |          |              |              |
| Aberdeen Angus                     | 1        |              |              |
| Aberdeen Angus Cross               | -4.16    | -6.52        | -2.09        |
| British Blue Cross                 | 21.10    | 17.80        | 25.09        |
| Charolais                          | -19.10   | -26.42       | -14.60       |
| Charolais Cross                    | -35.14   | -39.01       | -33.12       |
| Holstein Friesian                  | 20.94    | 15.69        | 26.58        |
| Limousin                           | 17.30    | 12.33        | 21.29        |
| Limousin Cross                     | 11.07    | 7.92         | 13.81        |
| Other                              | 21.20    | 17.97        | 24.05        |
| Simmental Cross                    | -2.87    | -6.56        | 0.55         |
| season_Q1                          | 1        |              |              |
| season_Q2                          | 5.09     | 3.06         | 6.10         |
| season_Q3                          | 1.99     | 0.36         | 3.42         |
| season_Q4                          | 7.08     | 5.89         | 8.72         |
| year_2013                          | 1        |              |              |
| year_2014                          | 8.37     | 7.79         | 9.64         |
| fluke*weight.center                | -0.02    | -0.03        | -0.0001      |
| sex_male*weight.center             | -0.25    | -0.26        | -0.21        |
| Aberdeen Angus Cross*weight.center | 0.08     | 0.05         | 0.11         |
| British Blue Cross*weight.center   | 0.05     | 0.01         | 0.11         |
| Charolais*weight.center            | 0.15     | 0.08         | 0.28         |
| Charolais Cross*weight.center      | 0.14     | 0.06         | 0.18         |
| Holstein Friesian*weight.center    | 0.79     | 0.71         | 0.83         |
| Limousin*weight.center             | 0.05     | -0.06        | 0.11         |
| Limousin Cross*weight.center       | 0.07     | 0.01         | 0.09         |
| Other*weight.center                | 0.05     | 0.01         | 0.06         |
| Simmental Cross*weight.center      | 0.02     | -0.02        | 0.09         |

**Table S3.** Fibrosis model results. Point estimates and confidence intervals for model parameters for estimating average difference of the age at slaughter in animals with different fibrosis scores at the mean slaughter carcass weight of 345 kg.

| Variable                           | Estimate | Lower 95% CI | Upper 95% CI |
|------------------------------------|----------|--------------|--------------|
| Intercept                          | 697.20   | 633.70       | 761.60       |
| fibrosis score 0                   | 1        | -            | -            |
| fibrosis score 1                   | 34.02    | 10.58        | 57.42        |
| fibrosis score 2                   | 93.33    | 60.85        | 127.20       |
| fibrosis score 3                   | 78.04    | 32.28        | 124.90       |
| weight.center                      | 0.44     | -0.41        | 1.33         |
| sex_female                         | 1        |              |              |
| sex_male                           | -41.14   | -71.92       | -11.32       |
| breed                              |          |              |              |
| Aberdeen Angus                     | 1        |              |              |
| Aberdeen Angus Cross               | -25.57   | -73.45       | 20.91        |
| British Blue Cross                 | -15.96   | -85.52       | 45.68        |
| Charolais                          | -5.45    | -116.50      | 103.90       |
| Charolais Cross                    | -43.86   | -100.50      | 9.80         |
| Holstein Friesian                  | -104.60  | -193.60      | -20.74       |
| Limousin                           | 44.89    | -32.27       | 125.80       |
| Limousin Cross                     | -27.97   | -81.27       | 20.20        |
| Other                              | -24.66   | -81.63       | 28.09        |
| Simmental Cross                    | -53.81   | -112.20      | 2.48         |
| season_Q1                          | 1        |              |              |
| season_Q2                          | 32.23    | -21.60       | 85.13        |
| season_Q3                          | 24.54    | -6.51        | 56.60        |
| season_Q4                          | 5.60     | -38.50       | 48.98        |
| year_2013                          | 1        |              |              |
| year_2014                          | 63.15    | 29.51        | 96.52        |
| fibrosis score 1*weight.center     | -0.04    | -0.50        | 0.39         |
| fibrosis score 2*weight.center     | -0.23    | -0.88        | 0.43         |
| fibrosis score 3*weight.center     | 0.27     | -1.05        | 1.54         |
| sex_male*weight.center             | -0.21    | -0.77        | 0.31         |
| Aberdeen Angus Cross*weight.center | 0.14     | -0.74        | 1.04         |
| British Blue Cross*weight.center   | -0.52    | -2.01        | 1.06         |
| Charolais*weight.center            | 0.36     | -3.19        | 4.19         |
| Charolais Cross*weight.center      | 0.27     | -0.67        | 1.24         |
| Holstein Friesian*weight.center    | 0.91     | -0.49        | 2.36         |
| Limousin*weight.center             | -0.11    | -1.49        | 1.27         |
| Limousin Cross*weight.center       | 0.62     | -0.24        | 1.55         |
| Other*weight.center                | 0.34     | -0.62        | 1.30         |
| Simmental Cross*weight.center      | 0.41     | -0.72        | 1.58         |

**Table S4.** Burden model results. Point estimates and confidence intervals for model parameters for estimating average difference of the age at slaughter in animals with different levels of burden at the mean slaughter carcass weight of 345 kg.

| Variable                           | Estimate | Lower 95% CI | Upper 95% CI |
|------------------------------------|----------|--------------|--------------|
| Intercept                          | 709.30   | 643.50       | 777.60       |
| burden 0                           | 1        |              |              |
| burden 1 to 10                     | 31.27    | 5.77         | 56.05        |
| burden >10                         | 76.86    | 31.05        | 123.90       |
| weight.center                      | 0.38     | -0.44        | 1.23         |
| sex_female                         | 1        |              |              |
| sex_male                           | -42.26   | -71.95       | -13.06       |
| breed                              |          |              |              |
| Aberdeen Angus                     | 1        |              |              |
| Aberdeen Angus Cross               | -36.37   | -84.22       | 10.19        |
| British Blue Cross                 | -27.21   | -92.88       | 41.32        |
| Charolais                          | 4.82     | -109.50      | 118.10       |
| Charolais Cross                    | -49.96   | -102.50      | 6.20         |
| Holstein Friesian                  | -124.00  | -211.30      | -33.73       |
| Limousin                           | 42.09    | -40.35       | 124.50       |
| Limousin Cross                     | -38.07   | -89.33       | 13.98        |
| Other                              | -29.73   | -83.80       | 25.46        |
| Simmental Cross                    | -70.14   | -126.60      | -7.84        |
| season_Q1                          | 1        |              |              |
| season_Q2                          | 41.77    | -10.55       | 93.30        |
| season_Q3                          | 31.36    | -0.97        | 61.96        |
| season_Q4                          | 9.64     | -33.91       | 55.04        |
| year_2013                          | 1        |              |              |
| year_2014                          | 68.56    | 34.36        | 103.30       |
| burden 1 to 10*weight.center       | -0.32    | -0.77        | 0.11         |
| burden >10*weight.center           | 0.93     | -0.01        | 1.89         |
| sex_male*weight.center             | -0.20    | -0.79        | 0.33         |
| Aberdeen Angus Cross*weight.center | 0.22     | -0.65        | 1.06         |
| British Blue Cross*weight.center   | -0.33    | -1.87        | 1.28         |
| Charolais*weight.center            | 0.21     | -3.53        | 3.97         |
| CharolaisCross*weight.center       | 0.36     | -0.61        | 1.29         |
| HolsteinFriesian*weight.center     | 0.76     | -0.67        | 2.18         |
| Limousin*weight.center             | 0.02     | -1.31        | 1.39         |
| LimousinCross*weight.center        | 0.69     | -0.22        | 1.58         |
| Other*weight.center                | 0.35     | -0.62        | 1.30         |
| Simmental Cross*weight.center      | 0.34     | -0.88        | 1.50         |
